## Role of TGF- $\beta$ signaling in uterine carcinosarcoma

Shailendra Kumar Dhar Dwivedi<sup>1</sup>, Scott D. McMeekin<sup>1</sup>, Katrina Slaughter<sup>1</sup> and Resham Bhattacharya<sup>1</sup>

<sup>1</sup> Department of Obstetrics and Gynecology, Stephenson Cancer Center, University of Oklahoma Health Science Center, Oklahoma, USA

**Correspondence to:** Resham Bhattacharya, **email:** Resham-Bhattacharya@ouhsc.edu

**Keywords:** uterine carcinosarcoma, EMT, c-Myc, TGF beta

**Received:** January 20, 2015

**Accepted:** March 03, 2015

**Published:** March 30, 2015

This is an open-access article distributed under the terms of the Creative Commons Attribution License, which permits unrestricted use, distribution, and reproduction in any medium, provided the original author and source are credited.

### ABSTRACT

**Uterine carcinosarcomas (UCS) are rare (3-4%) but highly aggressive, accounting for a disproportionately high (16.4%) mortality among uterine malignancies. Transforming growth factor beta (TGF $\beta$ ) is a multifunctional cytokine that regulates important cellular processes including epithelial-mesenchymal transition (EMT). Existence of biphasic elements and a report demonstrating amplification of TGF $\beta$  at 19q13.1 prompted us to investigate the role of TGF $\beta$  signaling in UCS.**

**Here we demonstrated the components of TGF $\beta$  pathway are expressed and functional in UCS. TGF $\beta$ -I induced significant Smad2/3 phosphorylation, migration and EMT responses in UCS cell lines which could be attenuated by the TGF $\beta$  receptor I (TGF $\beta$ R-I) or TGF $\beta$  receptor I/II (TGF $\beta$ R-I/II) inhibitor developed by Eli Lilly and company. Importantly, TGF $\beta$ -I induced proliferation was c-Myc dependent, likely through activation of cell cycle. c-Myc was induced by nuclear translocation of nuclear factor of activated T cells (NFAT-1) in response to TGF $\beta$ -I. Inhibition of NFAT-1 or TGF $\beta$ R-I blocked c-Myc induction, cell cycle progression and proliferation in UCS. In corroboration, mRNA levels of c-Myc were elevated in recurrent versus the non-recurrent UCS patient samples. Interestingly, in the absence of exogenous TGF $\beta$  the TGF $\beta$ R-I/II inhibitor enhanced proliferation likely through non-Smad pathways. Thus, inhibition of TGF $\beta$ R-I could be efficacious in treatment of UCS.**

### INTRODUCTION

UCS are biphasic tumors that are highly aggressive and rare accounting for ~3-4% of all uterine cancers. By definition these tumors are composed of a malignant epithelial component, typically with high grade endometrioid or serous features [1, 2]. The sarcomatous component contains neoplastic cells with morphology homologous or heterologous to tissue within the uterus. Arising mainly in the uterus, UCS has a high rate of extra-uterine spread at diagnosis and high rate of recurrence responsible for 16.4% mortality caused by uterine malignancies [3]. Even patients with early stage disease have recurrence rates of 30-50%. Despite the improvements noted with chemotherapy, less than 30% of patients with optimally resected, stage III-IV disease, remain progression free at 3 years. For patients with bulky advanced/recurrent disease, ~15% of patients remain

progression free at 2 years, and only 20% remain alive at 2 years [4, 5]. Clearly, there is a compelling need for improvement of existing treatments.

TGF $\beta$  is a multifunctional cytokine that not only regulates EMT [6], but in epithelial cells it suppresses growth and proliferation [7-9]. Contrastingly, aberrations in the TGF $\beta$  signaling regularly take place during tumorigenesis inducing the cancer cells to proliferate, invade, and metastasize beyond their tissue of origin [10-17]. Active TGF $\beta$  binds to the extracellular domain of a type II receptor, (TGF $\beta$ R-II), which then recruits and activates the type I receptor subunit (TGF $\beta$ R-I). This active receptor complex phosphorylates and activates the receptor-activated Smads (R-Smad), Smad2 and Smad3. Activated R-Smads then heterodimerize with the co-Smad- Smad4, and this complex translocates to the nucleus modulating specific target gene expression [18, 19]. Information regarding TGF $\beta$  signaling in UCS

is extremely limited. Chiyoda et al. recently reported that acquired markers of EMT were up-regulated and the TGF $\beta$  locus was amplified in 4 out of 7 UCS patient samples [20]. Hence the presence of biphasic, epithelial and mesenchymal elements in UCS and the known role of TGF $\beta$  in regulating EMT prompted us to investigate the functional role of TGF $\beta$  and whether the TGF $\beta$ R inhibitors would be efficacious in UCS.

Using patient samples and cell lines we have shown that the components of the TGF $\beta$  pathway are expressed and functional in UCS. Importantly, mRNA levels of TGF $\beta$ -I, TGF $\beta$ -II, TGF $\beta$ R-I and TGF $\beta$ R-II were higher in recurrent compared to the non-recurrent UCS patient samples. Using UCS cell lines we demonstrated that TGF $\beta$ -I induces significant Smad2/3 activation, cell proliferation, migration and EMT. We next evaluated the efficacy of inhibiting TGF $\beta$ R-I (using LY2157299, Galunisertib currently in clinical trials for solid tumors) or TGF $\beta$ R-I/II (using LY2109761) in mediating TGF $\beta$ -I induced proliferation, migration and EMT. LY2157299 and LY2109761 both inhibited Smad2/3 activation and TGF $\beta$ -I dependent migration. TGF $\beta$ -I induces NFAT-1 dependent c-Myc induction and proliferation in one UCS cell line. Interestingly, mRNA levels of c-Myc were elevated in the recurrent compared to the non-recurrent UCS patient samples. Importantly TGF $\beta$ R-I inhibitor blocked TGF $\beta$ -I induced c-Myc expression and subsequent proliferation. Both TGF $\beta$ R-I and TGF $\beta$ R-I/II inhibitor blocked TGF $\beta$ -I induced proliferation. Remarkably in absence of exogenous TGF $\beta$ -I the TGF $\beta$ R-I/II inhibitor dose-dependently enhanced proliferation likely through non-Smad pathways. Therefore, inhibition of TGF $\beta$ R-I in UCS could be efficacious in inhibiting TGF $\beta$ -I mediated EMT, proliferation and migration, while NFAT-1 and c-Myc could be potential prognostic markers predicting poor outcome.

## RESULTS

### Components of TGF $\beta$ pathway are expressed in UCS patient tissues and cell lines

The biphasic nature and a report demonstrating amplification of the TGF $\beta$  locus at 19q13.1 in UCS [20] prompted us to determine whether the TGF pathway is active in UCS patient samples. To this end we performed quantitative real time PCR (RT-qPCR) with RNA isolated from 10 UCS patient tumor samples. Of the 10, 5 recurred with progression free survival (PFS) ranging between 3-7 months and 5 patients remained free of recurrence with follow-up time ranging between 5-60 months. Interestingly, the relative mRNA expression of TGF $\beta$ -I, TGF $\beta$ -II, TGF $\beta$ R-I and TGF $\beta$ R-II (Fig. 1A) showed a trend towards higher expression in patients whose tumor

had recurred versus those that did not recur with TGF $\beta$ -I and TGF $\beta$ R-II being statistically significant. These mRNA levels were also evaluated in two UCS cell lines CS-99 [21] and FUMMT-1 [22] that had been previously described to be primarily sarcomatous yet expressing certain epithelial components. With the exception of TGF $\beta$ -I, TGF $\beta$ -II, TGF $\beta$ R-I and TGF $\beta$ R-II were expressed at significantly higher levels in FUMMT-1 compared to CS-99 (Fig. 1B). In accordance with the mRNA expression, CS-99 secretes significantly more TGF $\beta$ -I than FUMMT-1 (263.61  $\pm$  1.36 vs 19.58  $\pm$  0.37 pg/ml/mg protein) (Fig. 1C).

Having established that the primary components of the TGF $\beta$  pathway were expressed in UCS patient tissues and cell lines, we next evaluated Smad signaling in response to TGF $\beta$ -I in these cell lines. Stimulation with TGF $\beta$ -I induced significant phosphorylation of Smad2 and Smad3 in both FUMMT-1 and CS-99 cell lines indicating preservation of canonical signaling in these cell lines. Since TGF $\beta$  mediated signaling was intact we next tested the efficacy of LY2157299, TGF $\beta$ R-I inhibitor or LY2109761, TGF $\beta$ R-I and II dual inhibitor in inhibiting TGF $\beta$  mediated Smad signaling. Both the TGF $\beta$ R-I and TGF $\beta$ R-I/II inhibitors decreased Smad2 and Smad3 phosphorylation in a dose-dependent manner, however at lower concentrations of 0.1-1  $\mu$ M, the dual inhibitor demonstrated slightly better efficacy (Fig. 1D). These inhibitors have been developed by Eli-Lilly and company. LY2157299 (Galunisertib) is currently the only TGF $\beta$ -receptor kinase inhibitor being tested in Phase II trials for glioma, pancreatic cancer and hepatocellular cancer [23].

### Effect of TGF $\beta$ on cell proliferation, migration and EMT

Since TGF $\beta$  is a multifunctional cytokine that not only regulates EMT, but can also suppress or induce proliferation and migration in cell type specific manner, we next evaluated the effect of TGF $\beta$ -I on cell proliferation using the MTS assay. TGF $\beta$ -I induced significant dose-dependent proliferation in FUMMT-1 but not in CS-99 cells (Fig. 2A). TGF $\beta$ -II also significantly increased proliferation in FUMMT-1 but not in CS-99 cells (Supplement-1). Since FUMMT-1 expressed both the TGF $\beta$ R-I and TGF $\beta$ R-II, we next evaluated efficacy of LY2157299 and LY2109761 in inhibiting TGF $\beta$ -I induced proliferation. Both LY2157299 (Fig. 2B) and LY2109761 (Fig. 2C) dose dependently inhibited TGF $\beta$ -I induced proliferation. Surprisingly in absence of exogenous TGF $\beta$ -I, LY2109761 but not LY2157299 dose-dependently increased proliferation. Uncoupling the effect of TGF $\beta$ R-I inhibition from TGF $\beta$ R-II inhibition suggests that TGF $\beta$ R-II suppresses growth signals in FUMMT-1. Indeed, TGF $\beta$ R-II has previously been shown to directly associate with the CyclinB/Cdc2 complex and induce

G1/S phase arrest [24].

We next evaluated the effect of TGFβ-I on the migratory potential of these cell lines using the scratch migration assay (Fig. 2D). At 8h, TGFβ-I induced significant migration in both FUMMT-1 and CS-99 that was similarly and significantly inhibited upon treatment with either LY2157299 or LY2109761. Together these results suggest that canonical TGFβ signaling is functional in UCS cell lines and phosphorylation of Smad2/3 and migration can be significantly inhibited by the TGFβR-I or TGFβR-I/II inhibitor. Proliferation response to TGFβ-I however is distinct for FUMMT-1 and can be inhibited by the TGFβR-I inhibitor, dual receptor inhibition while successful at inhibiting TGFβ-I mediated response might also stimulate proliferation through non-canonical pathways.

At the mRNA level expression of Snail, Slug, Twist1, Vimentin, KLF4 and c-Myc were studied as indicators of EMT using RT-qPCR (Fig. 3A). Post TGFβ-I treatment, mRNA of Snail and Slug were significantly

induced in both FUMMT-1 and CS-99 that could be attenuated to the basal level by the TGFβR-I or TGFβR-I/II inhibitor treatment. In addition, in FUMMT-1 post TGFβ-I treatment there was significant upregulation of c-Myc while KLF-4 was downregulated at the mRNA level that returned to near control levels upon treatment with either inhibitor (Fig. 3A). At the protein level, TGFβ-I induced fibronectin and Snail in both the cell lines that returned to control levels upon treatment with TGFβR-I or TGFβR-I/II inhibitor (Fig. 3B). N-Cadherin and Vimentin levels did not significantly change in either cell line after treatment with TGFβ-I. While E-Cadherin was not detected in these cell lines at the protein level, we focused on two other epithelial markers, Epithelial Cell Adhesion Molecule (EPCAM) and Epithelial Membrane Antigen (EMA) (Fig. 3C). Post TGFβ-I treatment, downregulation of EPCAM was noticeable in FUMMT-1 while downregulation of EMA was striking in CS-99 cells. An evaluation of the cytokeratin (CK) levels demonstrated no significant changes in levels of CK-8 in either cell

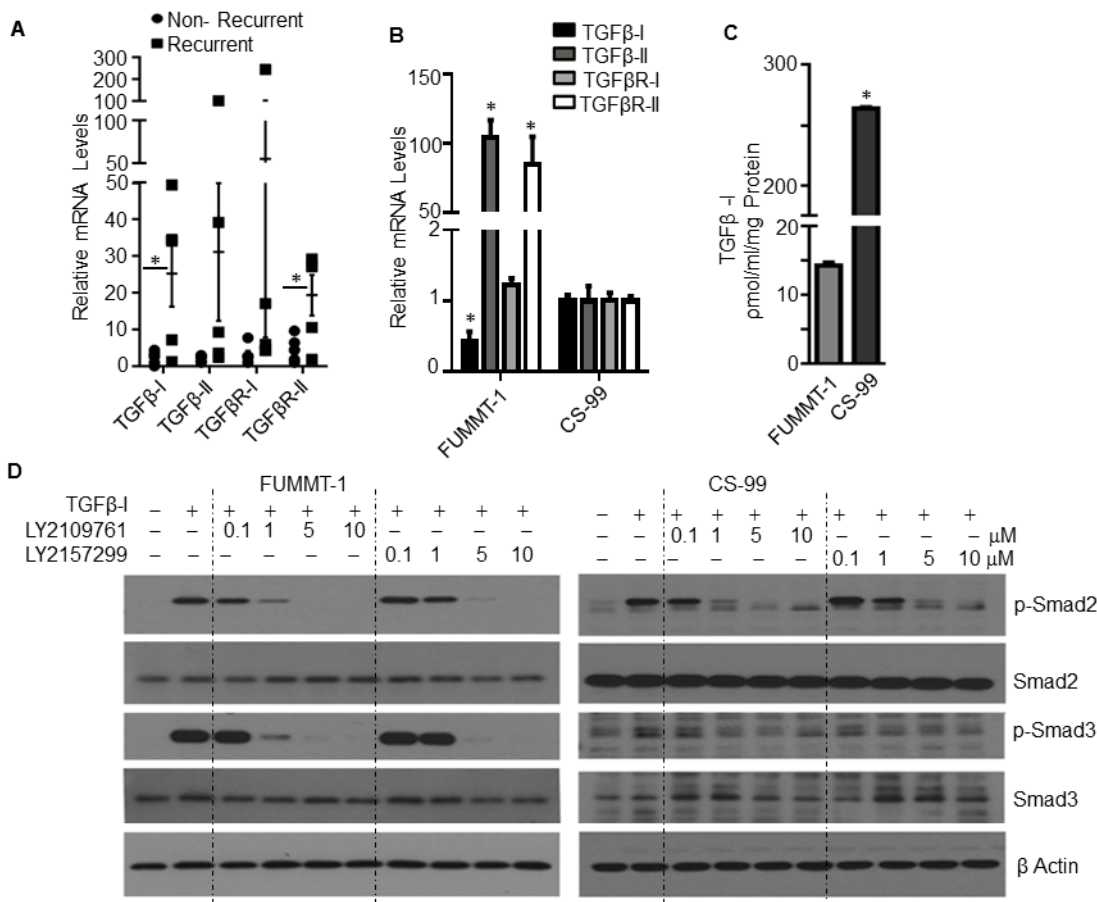

**Figure 1: TGFβ signaling in UCS.** A. RNA was isolated from UCS patient samples and relative mRNA levels were quantified using RT-qPCR compared to non-recurrent patient sample having highest  $\Delta$ CT value, Error bars represent standard error of mean. B. RNA was isolated from UCS cell lines and relative mRNA levels were quantified using RT-qPCR compared to CS-99. C. Cell free conditioned medium was collected from starved cells, TGFβ-I concentration was quantified & normalized with the total protein amount from the lysed cells. D. Cells were serum starved for 4h, pretreated with TGF-β receptor inhibitor subsequently treated with TGFβ-I (5 ng/ml) for 15 minutes, lysed and immunoblotted. \*,  $P < 0.05$  was considered significant. Error bars represent Standard Deviation (SD) except where indicated.

lines. Post TGF $\beta$ -I treatment significant downregulation in FUMMT-1 while significant upregulation in CS-99 cells was observed using the pan-cytokeratin antibody that detects CK-1, 5, 6 and 8. On the other a second cytokeratin antibody that detects acidic and basic CKs demonstrated significant upregulation at ~50 Kda in CS-99 cells post TGF $\beta$ -I treatment (Fig. 3C). Taken together it is clear that these cell lines express both epithelial and mesenchymal components and treatment with TGF $\beta$ -I further potentiate

mesenchymal differentiation evidenced by increased Slug, Snail and fibronectin expression. The significant expression of EMA in CS-99 but not in FUMMT-1, suggest a predominance of the epithelial component in this cell line. While KLF-4 is known to regulate EMT [25, 26] and its downregulation in FUMMT-1 is significant, the lack of significant KLF-4 downregulation in CS-99 suggests other molecular mechanisms such as Smad signaling to be instrumental in inducing EMT in UCS.

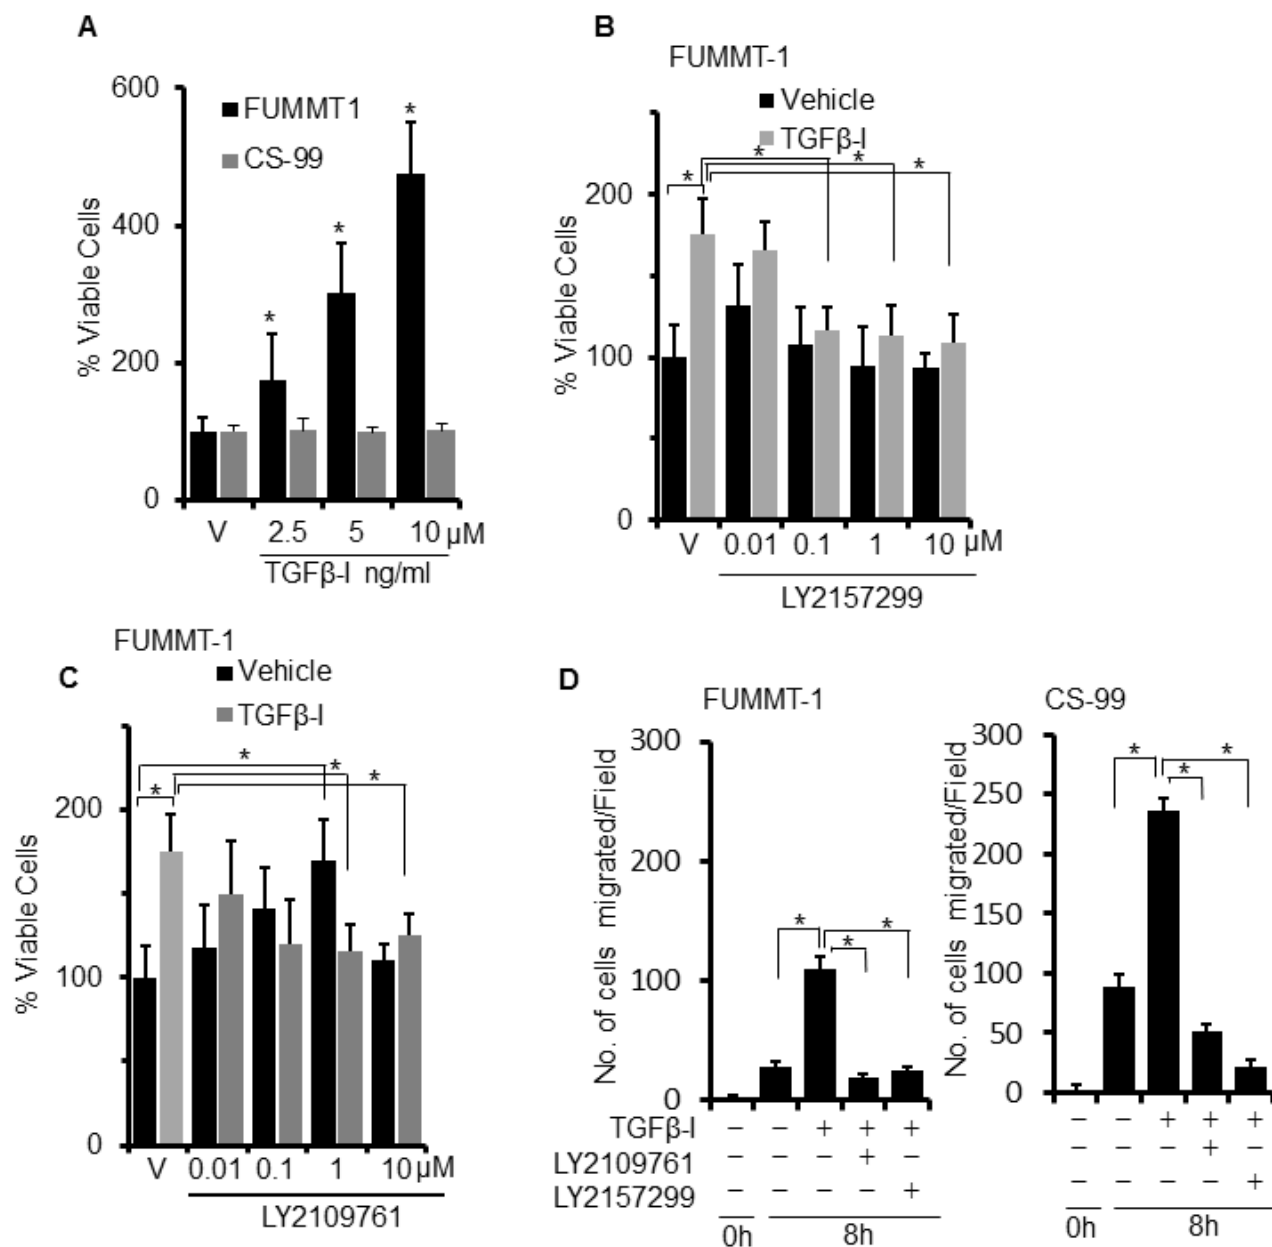

**Figure 2: Effect of TGF $\beta$  on cell proliferation and migration.** A. Cells were serum starved and treated with TGF $\beta$ -I for 24 h, % cell viability was determined using the MTS assay. B. and C. FUMMT-1 cells were serum starved for 4h, pretreated with LY2157299 (B) or LY2109761 (C) subsequently treated with TGF $\beta$ -I (5 ng/ml) for 24 h, % cell viability was determined using MTS assay. D. Scratch wounds were made to starved, confluent monolayers of FUMMT-1 and CS-99 cells, pretreated with TGF $\beta$  receptor inhibitors (5  $\mu$ M for 1 h) followed by 8h TGF $\beta$ -I (5 ng/ml) treatment. Micrographs were captured just after treatment and after 8 h treatment. Number of migrated cells were counted and plotted. \*,  $P < 0.05$  was considered significant. Error bars represent SD.

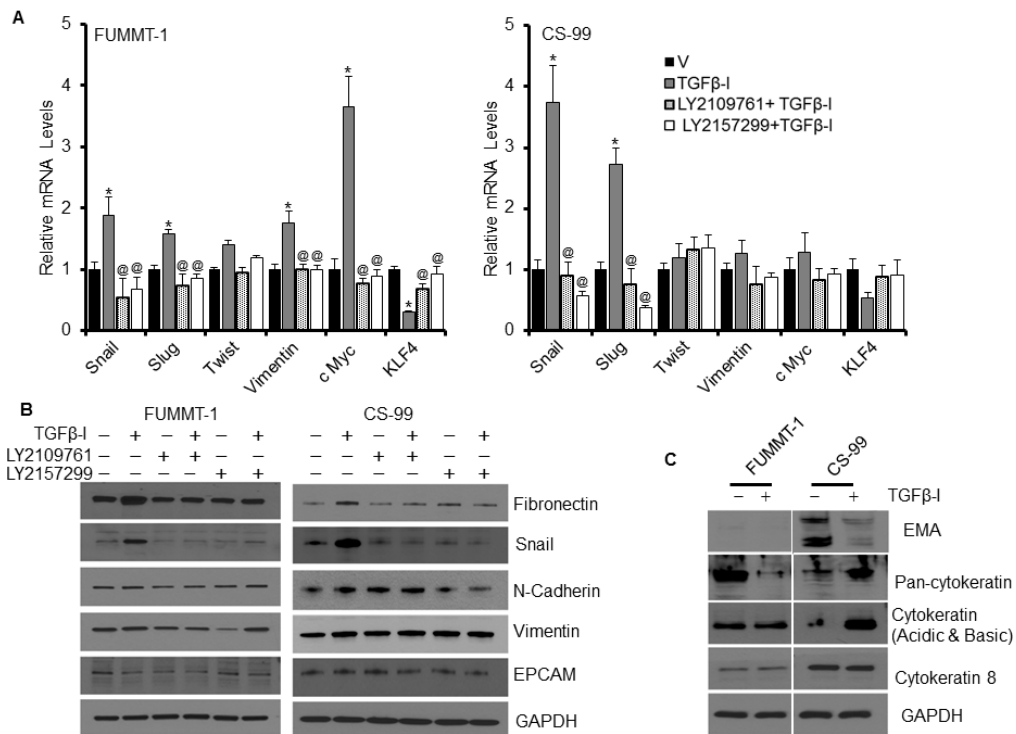

**Figure 3: Effect of TGFβR inhibitor LY2157299 and LY2109761 on TGFβ-I induced EMT.** **A.** FUMMT-1 and CS-99 cell were starved, pretreated with TGFβ receptor inhibitors (5 μM) and subsequently treated with TGFβ-I (5 ng/ml) for 24 h, Total RNA was isolated and relative mRNA levels were quantified using RT-qPCR. **B.** and **C.** similarly treated cells (as in A) were lysed and processed for Western blotting. \*,  $P < 0.05$  was considered significant compared with vehicle and @,  $P < 0.05$  was considered significant compared with TGFβ-I. Error bars represent SD.

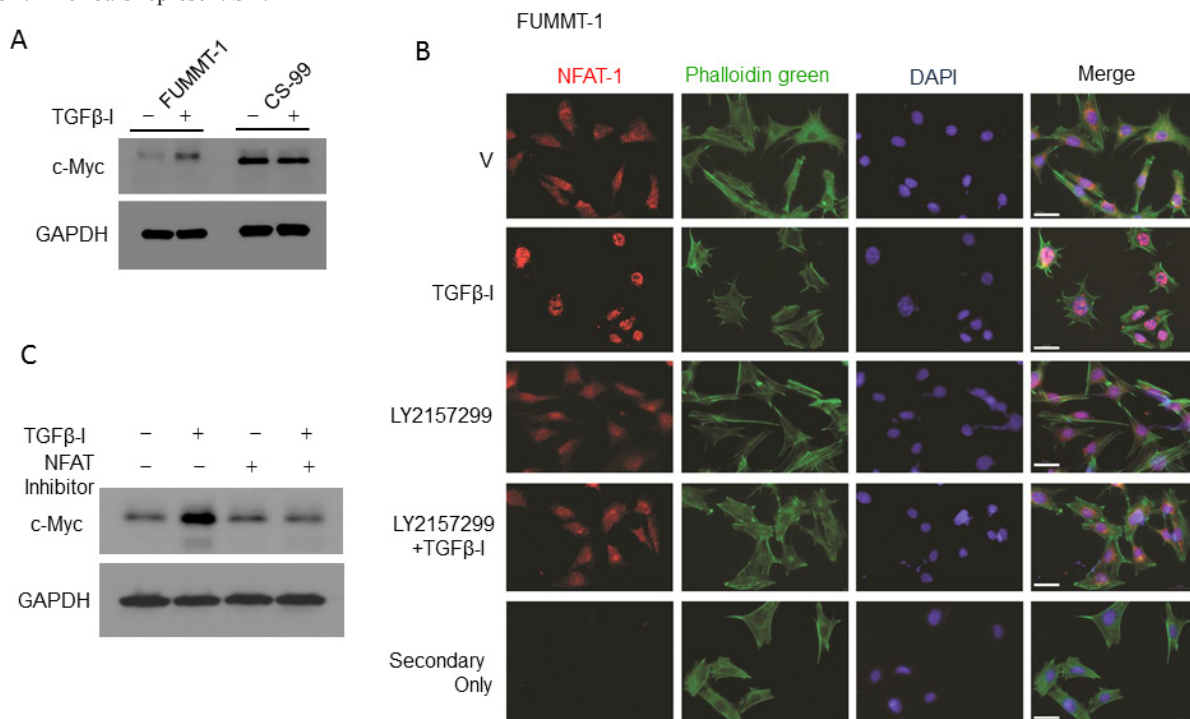

**Figure 4: TGFβ-I mediated c-Myc expression is regulated through NFAT-1.** **A.** FUMMT-1 and CS-99 cells were starved, treated with TGFβ-I (5 ng/ml) for 24h, lysed and immunoblotted for c-Myc and GAPDH. **B.** Effects of TGFβ-I and LY2157299 on NFAT-1 translocation was assayed by immunofluorescence in FUMMT-1. The images were acquired using a 40X objective (1.6X Optovar) with Zeiss Observer 2. Scale bar represents 50 μm. **C.** FUMMT-1 cells were starved, pretreated with NFAT-1 inhibitor (100 μM, 1 h) subsequently treated with TGFβ-I (5 ng/ml) for 24 h, lysed and processed for Western blotting.

## TGFβ-I and c-Myc signaling in UCS

Despite preservation of Smad signaling in both the cell lines, TGFβ-I induces proliferation in FUMMT-1 and not in CS-99. Strikingly TGFβ-I induces c-Myc mRNA and protein expression in FUMMT-1 only (Fig. 3A and 4A). Conventionally TGFβ is known to repress c-Myc transcription [27], where Smad3 binds to the TGF-β inhibitory element (TIE) on the c-Myc promoter [27]. However a previous report demonstrated that in pancreatic cancer TGFβ induces nuclear translocation of NFAT-1 that displaces Smad3 repressor complexes from the c-Myc promoter resulting in transcription and a switch from cell cycle inhibitor to growth promoter activities [28]. In corroboration we find that in FUMMT-1, TGFβ-I induces nuclear translocation of NFAT-1 (Fig. 4B) resulting in c-Myc expression. Interestingly LY2157299 treatment blocked nuclear translocation of NFAT-1 (Fig. 4B). Using

the NFAT inhibitor we showed that TGFβ-I mediated expression of c-Myc was NFAT-1 dependent (Fig. 4C). Furthermore the TGFβ-I induced proliferation response in FUMMT-1 was c-Myc dependent and could be attenuated by using a pharmacological (10058-F4) [29] (Fig. 5A) or genetic inhibitor (siRNA) of c-Myc (Fig. 5B). The c-Myc dependent proliferation was likely mediated through activation of cell cycle as evidenced by a significant increase in Cyclin B [30] and Cyclin D1 [31] protein levels that could be attenuated by c-Myc inhibitor (Fig. 5C) or c-Myc siRNA treatment (Supplement-2). Finally the TGFβR-I inhibitor also significantly downregulated TGFβ-I induced c-Myc, Cyclin B and Cyclin D1 levels while upregulating the cell cycle inhibitor p27 [32] (Fig. 5D). Interestingly the mRNA levels of c-Myc were elevated in the recurrent compared to the non-recurrent group of UCS patient samples as well (Fig. 5E).

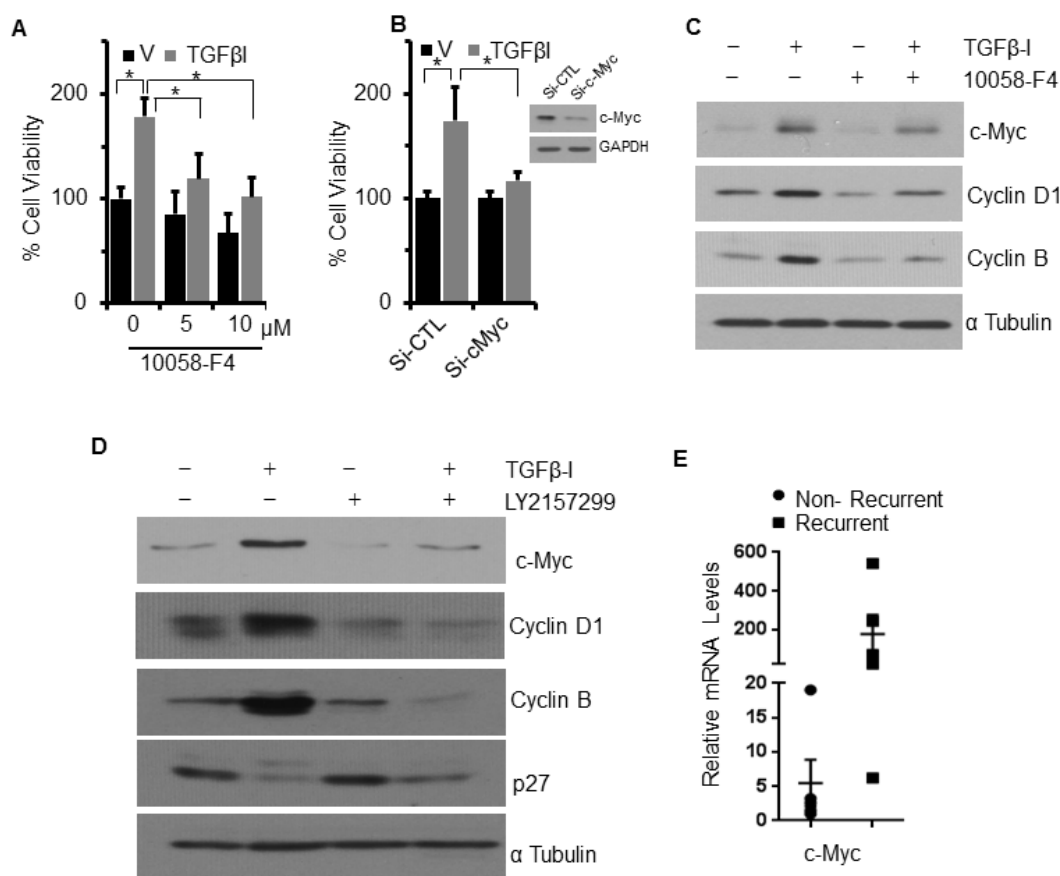

**Figure 5: TGFβ-I induced proliferation and cell cycle is mediated through c-Myc.** **A.** FUMMT-1 cells were starved pretreated with c-Myc inhibitor subsequently treated with Vehicle (V) or TGFβ-I (5 ng/ml) and relative cell viability was quantified using MTS assay. **B.** FUMMT-1 cells were transfected with either non-target si-RNA (Si-CTL) or Si-c-Myc, cells were plated in 96 well plate and TGFβ-I induced proliferation was evaluated using MTS assay. Efficiency of c-Myc silencing is shown in inset. **C.** FUMMT-1 cells were starved pretreated with c-Myc inhibitor (10058-F4, 5 μM, 1 h) and treated with Vehicle (V) or TGFβ-I (5ng/ml) for 24 h lysed and processed for Western blotting. **D.** FUMMT-1 cell were starved pretreated with LY2157299 for 1 h, subsequently treated with TGFβ-I for 24 h, lysed and processed for Western blotting. **E.** RNA was isolated from UCS patient samples and relative c-Myc mRNA levels with respect to non-recurrent patient sample having highest ΔCT value were quantified using RT-qPCR, Error bars represent standard error of mean. \*,  $P < 0.05$  was considered significant. Error bars represent SD except where indicated.

## DISCUSSION

Here the role of TGF $\beta$  signaling was evaluated in UCS patient samples and cell lines and efficacy of TGF $\beta$ R inhibitors was determined. Though limited in number the UCS patient samples demonstrated that those with recurrent disease had a trend towards increased expression of the TGF $\beta$  signaling components with TGF $\beta$ -1 and TGF $\beta$ R-II being statistically significant. The two UCS cell lines FUMMT-1 and CS-99 also expressed components of the TGF $\beta$  pathway. More importantly, TGF $\beta$ -I induced canonical activation of Smad2 and Smad3 in both of these cell lines that could be attenuated by LY2157299, TGF $\beta$ R-I or LY2109761, the TGF $\beta$ R-I and II dual inhibitor.

In keeping with the biphasic nature of UCS [33, 34], these cell lines though predominantly sarcomatous reportedly express epithelial components [35]. Clinically, the epithelial component of USC is usually immunoreactive with cytokeratins, EMA, and vimentin. The mesenchymal component usually stains for vimentin, smooth muscle actin, desmin, and focal cytokeratin [36]. Both the sarcomatous and carcinomatous components often coexpress epithelial markers and vimentin to varying degrees [33, 37, 38]. While TGF $\beta$  signaling is established to be anti-proliferative in epithelial cells [10, 39], its role in mesenchymal cells remains ambiguous. Our data clearly indicated that both the cell lines responded to TGF $\beta$  by upregulating mesenchymal markers such as Snail, Slug and fibronectin that could be attenuated by LY2157299 or LY2109761. However distinct differences in cytokeratin expression and its regulation in response to TGF $\beta$ -I were observed in the two cell lines. Also only CS-99 expressed EMA that was significantly downregulated by TGF $\beta$ -I suggesting that the epithelial component might be more prominent in this cell line compared to FUMMT-1. In addition, both the cell lines demonstrated significant migration in response to TGF $\beta$ -I that could be significantly inhibited by LY2157299 or LY2109761. Hence our data demonstrate that TGF $\beta$ -I induced Smad activation, EMT and migration response could be attenuated by inhibiting either TGF $\beta$ R-I or TGF $\beta$ R-I/II.

TGF $\beta$  however could potentiate proliferation only in the cell line that also induced c-Myc. Though conventionally TGF $\beta$  signaling inhibits c-Myc transcription, we believe in the mesenchymal component of UCS, TGF $\beta$  induces nuclear translocation of NFAT-1 that displaces Smad3 repressor complexes leading to c-Myc transcription. In corroboration, a previous report demonstrated that in pancreatic cancer TGF $\beta$  induced nuclear translocation of NFAT-1 that displaced Smad3 repressor complexes from the c-Myc promoter resulting in transcription and a switch from cell cycle inhibitor to growth promoter activities [28]. Enhanced c-Myc expression then activates cell cycle leading to unrestricted proliferation, all of which can be readily attenuated by the

TGF $\beta$ R-I inhibitor. Curiously in absence of exogenous TGF $\beta$ -I, the dual inhibition of TGF $\beta$ R-I and II but not TGF $\beta$ R-I increases proliferation dose-dependently. This suggests that in absence of TGF $\beta$ -I, the function of the two receptors can be uncoupled. TGF $\beta$ R-II functions as an inhibitor of pro-proliferative pathways that most likely do not involve Smads. Indeed TGF $\beta$ R-II has previously been shown to directly associate with the CyclinB/Cdc2 complex and induce G1/S phase arrest [24].

In conclusion these data demonstrate that the TGF $\beta$  pathway is functional in UCS and instrumental in inducing EMT, migration and proliferation, all of which can be potently inhibited by the TGF $\beta$ R-I inhibitor, LY 2157299. Galunisertib or LY 2157299 is currently the only TGF $\beta$ R-I kinase inhibitor that is in phase II clinical trials for glioma, pancreatic cancer, myelodysplastic syndrome and hepatocellular cancer. Therefore inhibition of TGF $\beta$ R-I could be efficacious in treatment of UCS and NFAT-1 and c-Myc could be potential markers predicting poor outcome.

## MATERIALS AND METHODS

### Cell culture

The human UCS cell line FUMMT-1 was purchased from Dr. Makoto Emoto (Division of Gynecology, Center of Preventive Medicine, Fukuoka Sanno Hospital, International University of Health and Welfare, Japan) and CS-99 was a kind gift from Dr. Jason Somarelli; Duke University Medical Center [upon approval from Dr. H. J. Schulten; (Institute of Pathology, University of Göttingen, Germany) and Dr. Gloria Huang (The University Hospital for Albert Einstein College of Medicine)]. FUMMT-1 was cultured in DMEM-F12 and CS-99 in DMEM supplemented with 10% heat inactivated FBS (Fisher Scientific) and 100 units penicillin and 100  $\mu$ g streptomycin/ml (Invitrogen).

### Tumor samples

In this study, 10 UCS patient samples were acquired from the Stephenson Cancer Center Biospecimen Acquisition Core and Bank following institutional guidelines. Of the 10 patients, 5 have recurred (4 are dead, one remains alive at 22 mo following salvage radiation and chemotherapy for a vaginal cuff recurrence), and 5 remain free of recurrence (follow-up time ranges from 5-60 mo). The median PFS was 4.8 (range 3-7 mo) for the recurrent group.

## Cell viability assay

Viability of UCS cells was determined using the tetrazolium compound based CellTiter 96<sup>®</sup> AQ<sub>ueous</sub> One Solution Cell Proliferation (MTS) assay (Promega). Cells were plated in 96 well plate at density of  $2.5 \times 10^3$  cells per well. 4h post serum starvation cells were subjected to TGF $\beta$ -I (R&D Biosystems) treatment alone or in presence of LY2157299 [40] (TGF $\beta$ R-I inhibitor, Selleck Chem), LY2109761 [41] (TGF $\beta$ R-I/II inhibitor, Selleck Chem), 10058-F4 (c-Myc Inhibitor, Sigma Aldrich), NFAT inhibitor (Cay-man Chemicals). After 24h treatment MTS assay was done and viability was calculated using vehicle as 100%. [42].

## TGF $\beta$ -I ELISA

TGF $\beta$ -I secretion was measured using Quantikine human TGF $\beta$ -I ELISA kit (R&D Systems) following the manufacturer's direction. Briefly equal number of FUMMT-1 and CS-99 cells were plated on 60 mm plate, were serum starved and supplemented with serum-free medium for 48 h. Cell-free supernatant was collected and total TGF $\beta$ -I was quantified by interpolation from the standard curve generated with rTGF $\beta$ -I. Data are reported as the mean level of triplicate samples  $\pm$  SD normalized with total protein content of cells.

## RNA isolation and RTqPCR

Total RNA from frozen patient tumor samples and cell lines were extracted using quick RNA miniprep kit (Zymo Research) following manufacturer's protocol. 1  $\mu$ g of isolated RNA was reverse transcribed (iScript cDNA Synthesis kit, Bio-Rad) using random hexamer primers. RT-qPCR analysis was performed using iTaq<sup>™</sup> universal SYBR<sup>®</sup> Green supermix. Primers were designed using Primer-BLAST and synthesized from Integrated DNA Technologies (IDT, sequences are available upon request). The comparative  $\Delta\Delta C_t$  method was used to calculate the relative abundance of the mRNA and normalized with that of 18s rRNA [43] and western blotting.

## siRNA transfection

Gene silencing was performed in 60 mm culture dish containing  $5 \times 10^5$  cells in suspension using Hiperfect (Qiagen) and 100nM siRNA (scrambled control, Dharmacon) Si-c-Myc (Sigma) in OPTIMEM (Invitrogen). Effective silencing was achieved after 48h of transfection determined by RT-qPCR [44].

## Western blotting

Total cell lysate was prepared in RIPA (Boston Bioproducts) containing protease and phosphatase inhibitor cocktail (Thermo). The cell lysate was quantified and proteins separated on SDS-PAGE and transferred to the PVDF (Bio-Rad) membrane. Membranes were blocked in 5% nonfat milk in TBS with 0.1% Tween-20 (TBST) for 1 h at room temperature followed by incubation with primary antibodies in TBST with 1% BSA overnight. The following primary antibodies were used – p Smad-2, p Smad-3, Smad-2, Smad-3, Snail, Vimentin, EPCAM, c-Myc, NFAT-1, Cyclin B, Cyclin D1, (Cell signaling Technology), Fibronectin, N-Cad (BD Biosciences), Pancytokeratin, GAPDH,  $\alpha$  tubulin and  $\beta$  actin (Sigma), Acidic and basic Cytokeratin AE1/AE3 (Millipore), EMA (Dako), p27 (Santa Cruz Biotechnology), and cytokeratin-8 (Developmental Studies Hybridoma Bank, University of Iowa). Secondary antibodies (from sigma) were used at a concentration of 1:10,000. Equal loading was verified by immunoblotting with GAPDH,  $\alpha$ Tubulin or  $\beta$  Actin [44].

## Migration assay

TGF $\beta$ -I induced migration was evaluated using the scratch migration assay. FUMMT-1 and CS-99 cells were plated in 6-well plate and were allowed to grow in 10% FBS containing medium to confluence. Cells were then serum starved for 4 h and treated with TGF $\beta$ R inhibitors (5 $\mu$ M). 1h post inhibitor treatment cells were scratched with a pipette tip, washed twice with PBS and treated with either vehicle, TGF $\beta$ -I 5 ng/ml or TGF $\beta$ R inhibitor + TGF $\beta$ -I in media containing 0.5% FBS. Cells were imaged immediately and 8 hours after treatment using an Olympus CK40 microscope. Number of migrated cells from 3 different fields were counted using ImageJ analysis software (NIH) [44]. Experiment was repeated three times in triplicate.

## Immunofluorescence

Localization of NFAT-1 was determined by immunostaining followed by microscopy. Approximately,  $1.5 \times 10^3$  cells were plated per chamber of 4-chambered slides. After 18 h, the cells were washed twice with serum-free medium, serum starved and treated as indicated. 6h post TGF $\beta$ -I (5ng/ml) treatment cells were fixed with 4% PFA, permeabilized with 0.25% TritonX-100 in PBS, blocked with 5% BSA in PBS, incubated with primary NFAT-1 antibody in 1% BSA-PBS (overnight), followed by incubation with the goat anti-rabbit secondary (Alexa flour 568, 1:1000 dilution in 1% BSA containing PBS) and Phalloidin-Alexa 488 conjugate (Invitrogen; 1:500



dilution in 1% BSA containing PBS) for 1h at RT. The cells were washed 3×3 min with PBS after each step during the immunostaining. The cells were then mounted with VECTASHIELD® mounting medium with DAPI (Vector Laboratories). The images were acquired using 40X objective (with 1.6X Optovar) using Zeiss Observer 2.

## Data analysis and statistics

All the experiments were performed in triplicate and repeated independently 3 times. Transfection experiments were performed by pooling cells from 2 different independent transfection, which were again performed in duplicate. Data are expressed as means ± standard deviation (SD) or standard error of the mean (SEM) as indicated. Student's t test was used for statistical analysis with significance set at  $P < 0.05$ .

## ACKNOWLEDGMENTS

This study was supported by the National Institutes of Health, RO1CA157481 to RB.

## CONFLICTS OF INTEREST

There is no conflict of interest that I should disclose.

## REFERENCES

1. Amant F, Coosemans A, Debiec-Rychter M, Timmerman D and Vergote I. Clinical management of uterine sarcomas. *The Lancet Oncology*. 2009; 10:1188-1198.
2. Kermoian LE and Garcia RL. Carcinosarcomas (malignant mixed Mullerian tumor) of the uterus: advances in elucidation of biologic and clinical characteristics. *Journal of the National Comprehensive Cancer Network : JNCCN*. 2009; 7:550-556; quiz 557.
3. Major FJ, Blessing JA, Silverberg SG, Morrow CP, Creasman WT, Currie JL, Yordan E and Brady MF. Prognostic factors in early-stage uterine sarcoma. A Gynecologic Oncology Group study. *Cancer*. 1993; 71(4 Suppl):1702-1709.
4. Clement PB and Scully RE. Mullerian adenosarcoma of the uterus. A clinicopathologic analysis of ten cases of a distinctive type of mullerian mixed tumor. *Cancer*. 1974; 34:1138-1149.
5. Clement PB and Scully RE. Mullerian adenosarcoma of the uterus: a clinicopathologic analysis of 100 cases with a review of the literature. *Human pathology*. 1990; 21:363-381.
6. Xu J, Lamouille S and Derynck R. TGF-beta-induced epithelial to mesenchymal transition. *Cell research*. 2009; 19:156-172.
7. Elliott RL and Blobe GC. Role of transforming growth factor Beta in human cancer. *Journal of clinical oncology : official journal of the American Society of Clinical Oncology*. 2005; 23:2078-2093.
8. Gold LI. The role for transforming growth factor-beta (TGF-beta) in human cancer. *Critical reviews in oncogenesis*. 1999; 10:303-360.
9. Arteaga CL, Dugger TC, Winnier AR and Forbes JT. Evidence for a positive role of transforming growth factor-beta in human breast cancer cell tumorigenesis. *Journal of cellular biochemistry Supplement*. 1993; 17G:187-193.
10. Wakefield LM and Roberts AB. TGF-beta signaling: positive and negative effects on tumorigenesis. *Current opinion in genetics & development*. 2002; 12:22-29.
11. Woodruff TK. Regulation of cellular and system function by activin. *Biochemical pharmacology*. 1998; 55:953-963.
12. Miyazono K, Kusanagi K and Inoue H. Divergence and convergence of TGF-beta/BMP signaling. *Journal of cellular physiology*. 2001; 187:265-276.
13. Dennler S, Goumans MJ and ten Dijke P. Transforming growth factor beta signal transduction. *Journal of leukocyte biology*. 2002; 71:731-740.
14. Yue J and Mulder KM. Transforming growth factor-beta signal transduction in epithelial cells. *Pharmacology & therapeutics*. 2001; 91:1-34.
15. Engel ME, Datta PK and Moses HL. Signal transduction by transforming growth factor-beta: a cooperative paradigm with extensive negative regulation. *Journal of cellular biochemistry Supplement*. 1998; 30-31:111-122.
16. Brand T and Schneider MD. Transforming growth factor-beta signal transduction. *Circulation research*. 1996; 78:173-179.
17. Yan Z, Winawer S and Friedman E. Two different signal transduction pathways can be activated by transforming growth factor beta 1 in epithelial cells. *The Journal of biological chemistry*. 1994; 269:13231-13237.
18. Massague J. TGF-beta signal transduction. *Annual review of biochemistry*. 1998; 67:753-791.
19. Shi Y and Massague J. Mechanisms of TGF-beta signaling from cell membrane to the nucleus. *Cell*. 2003; 113:685-700.
20. Chiyoda T, Tsuda H, Tanaka H, Kataoka F, Nomura H, Nishimura S, Takano M, Susumu N, Saya H and Aoki D. Expression profiles of carcinosarcoma of the uterine corpus-are these similar to carcinoma or sarcoma? *Genes, chromosomes & cancer*. 2012; 51:229-239.
21. Schulten HJ, Wolf-Salگو J, Grundker C, Gunawan B and Fuzesi L. Characterization of a newly established uterine carcinosarcoma cell line featuring the sarcomatous phenotype of the tumor *in vitro*. *International journal of gynecological cancer : official journal of the International Gynecological Cancer Society*. 2008; 18:339-344.
22. Emoto M, Iwasaki H, Kikuchi M, Ishiguro M, Kubota T, Izumi H, Shirakawa K and Kaneko Y. Two cell lines

- established from mixed mullerian tumors of the uterus. Morphologic, immunocytochemical, and cytogenetic analyses. *Cancer*. 1992; 69:1759-1768.
23. Yingling JM, Blanchard KL and Sawyer JS. Development of TGF-beta signalling inhibitors for cancer therapy. *Nature reviews Drug discovery*. 2004; 3:1011-1022.
  24. Liu JH, Wei S, Burnette PK, Gamero AM, Hutton M and Djeu JY. Functional association of TGF-beta receptor II with cyclin B. *Oncogene*. 1999; 18:269-275.
  25. Cui J, Shi M, Quan M and Xie K. Regulation of EMT by KLF4 in gastrointestinal cancer. *Current cancer drug targets*. 2013; 13:986-995.
  26. Tiwari N, Meyer-Schaller N, Arnold P, Antoniadis H, Pachkov M, van Nimwegen E and Christofori G. Klf4 is a transcriptional regulator of genes critical for EMT, including Jnk1 (Mapk8). *PloS one*. 2013; 8:e57329.
  27. Frederick JP, Liberati NT, Waddell DS, Shi Y and Wang XF. Transforming growth factor beta-mediated transcriptional repression of c-myc is dependent on direct binding of Smad3 to a novel repressive Smad binding element. *Molecular and cellular biology*. 2004; 24:2546-2559.
  28. Singh G, Singh SK, Konig A, Reutlinger K, Nye MD, Adhikary T, Eilers M, Gress TM, Fernandez-Zapico ME and Ellenrieder V. Sequential activation of NFAT and c-Myc transcription factors mediates the TGF-beta switch from a suppressor to a promoter of cancer cell proliferation. *The Journal of biological chemistry*. 2010; 285:27241-27250.
  29. Follis AV, Hammoudeh DI, Daab AT and Metallo SJ. Small-molecule perturbation of competing interactions between c-Myc and Max. *Bioorganic & medicinal chemistry letters*. 2009; 19:807-810.
  30. Hwang A, Maity A, McKenna WG and Muschel RJ. Cell cycle-dependent regulation of the cyclin B1 promoter. *The Journal of biological chemistry*. 1995; 270:28419-28424.
  31. Stacey DW. Cyclin D1 serves as a cell cycle regulatory switch in actively proliferating cells. *Current opinion in cell biology*. 2003; 15:158-163.
  32. Moller MB. P27 in cell cycle control and cancer. *Leukemia & lymphoma*. 2000; 39:19-27.
  33. George E, Manivel JC, Dehner LP and Wick MR. Malignant mixed mullerian tumors: an immunohistochemical study of 47 cases, with histogenetic considerations and clinical correlation. *Human pathology*. 1991; 22:215-223.
  34. Auerbach HE, LiVolsi VA and Merino MJ. Malignant mixed Mullerian tumors of the uterus. An immunohistochemical study. *International journal of gynecological pathology : official journal of the International Society of Gynecological Pathologists*. 1988; 7:123-130.
  35. Kounelis S, Jones MW, Papadaki H, Bakker A, Swalsky P and Finkelstein SD. Carcinosarcomas (malignant mixed mullerian tumors) of the female genital tract: comparative molecular analysis of epithelial and mesenchymal components. *Human pathology*. 1998; 29:82-87.
  36. Clement PB Y, RH. (2000). *Atlas of gynecologic surgical pathology*. Philadelphia.
  37. Meis JM and Lawrence WD. The immunohistochemical profile of malignant mixed mullerian tumor. Overlap with endometrial adenocarcinoma. *American journal of clinical pathology*. 1990; 94:1-7.
  38. de Brito PA, Silverberg SG and Orenstein JM. Carcinosarcoma (malignant mixed mullerian (mesodermal) tumor) of the female genital tract: immunohistochemical and ultrastructural analysis of 28 cases. *Human pathology*. 1993; 24:132-142.
  39. Hannon GJ and Beach D. p15INK4B is a potential effector of TGF-beta-induced cell cycle arrest. *Nature*. 1994; 371:257-261.
  40. Bueno L, de Alwis DP, Pitou C, Yingling J, Lahn M, Glatt S and Troconiz IF. Semi-mechanistic modelling of the tumour growth inhibitory effects of LY2157299, a new type I receptor TGF-beta kinase antagonist, in mice. *European journal of cancer*. 2008; 44:142-150.
  41. Melisi D, Ishiyama S, Scwabas GM, Fleming JB, Xia Q, Tortora G, Abbruzzese JL and Chiao PJ. LY2109761, a novel transforming growth factor beta receptor type I and type II dual inhibitor, as a therapeutic approach to suppressing pancreatic cancer metastasis. *Molecular cancer therapeutics*. 2008; 7:829-840.
  42. Bhattacharya R, Nicoloso M, Arvizo R, Wang E, Cortez A, Rossi S, Calin GA and Mukherjee P. MiR-15a and MiR-16 control Bmi-1 expression in ovarian cancer. *Cancer research*. 2009; 69:9090-9095.
  43. Dwivedi SK, Singh N, Kumari R, Mishra JS, Tripathi S, Banerjee P, Shah P, Kukshal V, Tyagi AM, GaiKWAD AN, Chaturvedi RK, Mishra DP, Trivedi AK, Sanyal S, Chattopadhyay N, Ramachandran R, et al. Bile acid receptor agonist GW4064 regulates PPARgamma coactivator-1alpha expression through estrogen receptor-related receptor alpha. *Molecular endocrinology*. 2011; 25:922-932.
  44. Wang E, Bhattacharyya S, Szabolcs A, Rodriguez-Aguayo C, Jennings NB, Lopez-Berestein G, Mukherjee P, Sood AK and Bhattacharya R. Enhancing chemotherapy response with Bmi-1 silencing in ovarian cancer. *PloS one*. 2011; 6:e17918.
