# Supplementary material for: Role of TGF-β signaling in uterine carcinosarcoma
Source: PubMed Central journal article supplement (PMC4546494; doi:10.18632/oncotarget.3711), 2015-03-30
Supplement: oncotarget-06-14646-s001.pdf [file oncotarget-06-14646-s001.pdf]

## Role of TGF- $\beta$ signaling in uterine carcinosarcoma

### Supplementary Material

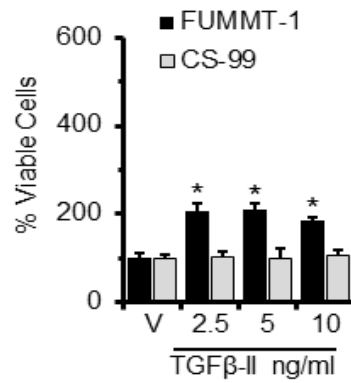

#### Supplemental Figure 1: TGF $\beta$ -II mediated proliferation in UCS cell lines.

Cells were serum starved and treated with TGF $\beta$ -II for 24 h, % cell viability was calculated using MTS assay \*, P < 0.05 was considered significant. Error bars represent SD.

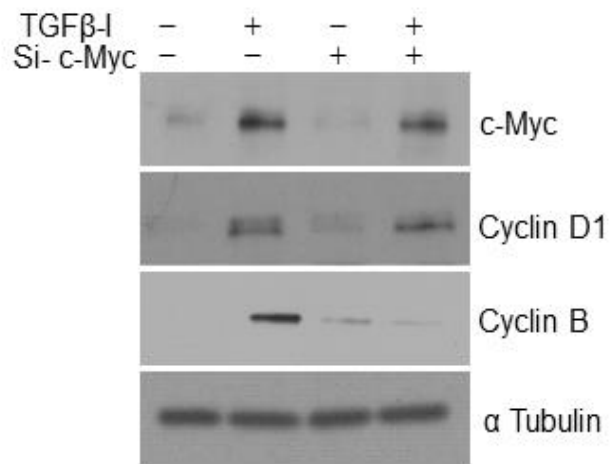

**Supplemental Figure 2: TGFβ-I induced cell cycle progression is mediated through c-Myc.**

FUMMT-1 cells were transfected with either non-target si-RNA (Si-CTL) or Si-c-Myc, 48h post transfection cells were serum starved (4h) subsequently treated with TGFβ-I or vehicle for 24h, lysed and processed for Western blotting.
